# Supplementary material for: Trends in Anaphylaxis Hospitalizations among Adults in Spain and Their Relationship with Asthma—Analysis of Hospital Discharge data from 2016 to 2021
Source: MDPI journal article supplement (doi:10.3390/healthcare11233016), 2023-11-22
Supplement: s1 [file s1]

**Table S1.** ICD-10 codes.

| Variable                                  | ICD-10                                |
|-------------------------------------------|---------------------------------------|
| Anaphylaxis                               | T78.0xx, T78.2xxx, T80.5xxx, T88.6xxx |
| Anaphylactic reaction due to food, n (%)  | T78.0xx                               |
| Anaphylactic reaction due to serum, n (%) | T80.5xxx                              |
| Anaphylactic reaction due to drugs, n (%) | T88.6xxx                              |
| Anaphylactic shock, unspecified, n (%)    | T78.2xxx                              |
| Asthma, n (%)                             | J45                                   |
| Obesity, n (%)                            | E66                                   |
| Obstructive sleep apnea, n(%)             | G47.3                                 |
| GERD, n(%)                                | K21                                   |
| Chronic rhinitis, n(%)                    | J31.0                                 |
| Atopic dermatitis, n(%)                   | L20                                   |
| Anxiety, n (%)                            | F41                                   |
| Depression, n(%)                          | F32                                   |
| COPD, n(%)                                | J44                                   |
| Hypertension, n(%)                        | I10                                   |
| Ischemic heart disease, n(%)              | I21                                   |
| Atrial fibrillation, n(%)                 | I48                                   |
| Hypothyroidism, n(%)                      | E03                                   |
| Hyperthyroidism, n(%)                     | E05                                   |
| Diabetes mellitus, n(%)                   | E11                                   |
| Hypotension, n(%)                         | I95                                   |
| Syncope/collapse, n(%)                    | R55                                   |
| Nausea/vomiting, n(%)                     | R11.2                                 |
| Abdominal pain, n(%)                      | R10                                   |
| Acute respiratory failure, n(%)           | J96.0                                 |
| Urticaria, n(%)                           | L50                                   |
| Noninvasive mechanical ventilation, n (%) | 5A09357, 5A09457, 5A09557             |
| Invasive mechanical ventilation, n (%)    | 5A1945Z, 5A1955Z, 5A1935Z             |

GERD: Gastroesophageal reflux disease; COPD: chronic obstructive pulmonary disease

**Table S2.** Characteristics, chronic conditions, specific signs and symptoms of hospital admissions with and without a diagnosis of asthma in Spain, 2016-2021 according to the severity of anaphylaxis.

|                                           | Asthma       |              |        | No asthma    |              |        |
|-------------------------------------------|--------------|--------------|--------|--------------|--------------|--------|
|                                           | Severe       | Not severe   | p      | Severe       | Not severe   | p      |
| N                                         | 189          | 362          |        | 1795         | 3556         |        |
| Age, mean (SD)                            | 51.95(18.21) | 54.06(19.41) | 0.049  | 61.44(15.84) | 60.69(18.05) | 0.086  |
| 18-44 years, n (%)                        | 62(32.8)     | 129(35.64)   | 0.047  | 259(14.43)   | 706(19.85)   | 0.075  |
| 45-64 years, n (%)                        | 77(40.74)    | 112(30.94)   |        | 680(37.88)   | 1233(34.67)  |        |
| ≥65 years, n (%)                          | 50(26.46)    | 121(33.43)   |        | 856(47.69)   | 1617(45.47)  |        |
| Women, n (%)                              | 113(59.79)   | 248(68.51)   | 0.041  | 831(46.3)    | 1775(49.92)  | 0.012  |
| Smoking, n(%)                             | 29(15.34)    | 59(16.3)     | 0.772  | 310(17.27)   | 504(14.17)   | 0.003  |
| Anaphylactic reaction due to food, n (%)  | 47(24.87)    | 85(23.48)    | 0.717  | 152(8.47)    | 463(13.02)   | <0.001 |
| Anaphylactic reaction due to serum, n (%) | 1(0.53)      | 5(1.38)      | 0.360  | 60(3.34)     | 97(2.73)     | 0.208  |
| Anaphylactic reaction due to drugs, n (%) | 98(51.85)    | 187(51.66)   | 0.965  | 1125(62.67)  | 2058(57.87)  | 0.001  |
| Anaphylactic shock, unspecified, n (%)    | 43(22.75)    | 85(23.48)    | 0.847  | 448(24.96)   | 934(26.27)   | 0.302  |
| Obesity, n (%)                            | 20(10.58)    | 40(11.05)    | 0.867  | 207(11.53)   | 335(9.42)    | 0.016  |
| Obstructive sleep apnea, n(%)             | 9(4.76)      | 16(4.42)     | 0.855  | 112(6.24)    | 186(5.23)    | 0.129  |
| GERD, n(%)                                | 4(2.12)      | 11(3.04)     | 0.528  | 19(1.06)     | 45(1.27)     | 0.511  |
| Chronic rhinitis, n(%)                    | 3(1.59)      | 5(1.38)      | 0.848  | 1(0.06)      | 4(0.11)      | 0.521  |
| Atopic dermatitis, n(%)                   | 4(2.12)      | 8(2.21)      | 0.943  | 4(0.22)      | 2(0.06)      | 0.086  |
| Anxiety, n (%)                            | 7(3.7)       | 9(2.49)      | 0.419  | 53(2.95)     | 113(3.18)    | 0.654  |
| Depression, n(%)                          | 6(3.17)      | 16(4.42)     | 0.478  | 65(3.62)     | 120(3.37)    | 0.641  |
| COPD, n(%)                                | 13(6.88)     | 11(3.04)     | 0.036  | 145(8.08)    | 294(8.27)    | 0.811  |
| Hypertension, n(%)                        | 53(28.04)    | 86(23.76)    | 0.272  | 603(33.59)   | 1120(31.5)   | 0.121  |
| Ischemic heart disease, n(%)              | 8(4.23)      | 1(0.28)      | 0.001  | 94(5.24)     | 85(2.39)     | <0.001 |
| Atrial fibrillation, n(%)                 | 13(6.88)     | 29(8.01)     | 0.634  | 262(14.6)    | 341(9.59)    | <0.001 |
| Hypothyroidism, n(%)                      | 8(4.23)      | 33(9.12)     | 0.038  | 83(4.62)     | 201(5.65)    | 0.113  |
| Hyperthyroidism, n(%)                     | 1(0.53)      | 5(1.38)      | 0.360  | 12(0.67)     | 25(0.7)      | 0.886  |
| Diabetes mellitus, n(%)                   | 23(12.17)    | 46(12.71)    | 0.856  | 300(16.71)   | 614(17.27)   | 0.611  |
| Hypotension, n(%)                         | 6(3.17)      | 18(4.97)     | 0.326  | 117(6.52)    | 214(6.02)    | 0.473  |
| Syncope/collapse, n(%)                    | 1(0.53)      | 7(1.93)      | 0.191  | 21(1.17)     | 74(2.08)     | 0.017  |
| Nausea/vomiting, n(%)                     | 3(1.59)      | 4(1.1)       | 0.631  | 6(0.33)      | 34(0.96)     | 0.013  |
| Abdominal pain, n(%)                      | 4(2.12)      | 6(1.66)      | 0.702  | 11(0.61)     | 48(1.35)     | 0.015  |
| Acute respiratory failure, n(%)           | 57(30.16)    | 37(10.22)    | <0.001 | 317(17.66)   | 212(5.96)    | <0.001 |
| Urticaria, n(%)                           | 7(3.7)       | 11(3.04)     | 0.677  | 22(1.23)     | 93(2.62)     | 0.001  |
| Invasive mechanical ventilation, n (%)    | 75(39.68)    | 9(2.49)      | <0.001 | 515(28.69)   | 78(2.19)     | <0.001 |
| Noninvasive mechanical ventilation, n (%) | 13(6.88)     | 9(2.49)      | 0.012  | 94(5.24)     | 38(1.07)     | <0.001 |

GERD: Gastroesophageal reflux disease; COPD: chronic obstructive pulmonary disease. ICU: Intensive care unit. IHM: In-hospital mortality.

**Table S3.** Multivariable analysis of the chronic conditions presents on admission and associated with severe anaphylaxis in Spain, 2016-2021 according to asthma status.

|                        |             | Asthma           | All             |
|------------------------|-------------|------------------|-----------------|
|                        |             | OR (95%CI)       | OR (95%CI)      |
| Age, years             | 18-44 years | 1                | 1               |
|                        | 45-64 years | 0.81(0.46-1.45)  | 0.88(0.6-1.27)  |
|                        | ≥65 years   | 1.34(0.84-2.13)  | 1.21(1.01-1.44) |
| Sex                    | Women       | 0.89(0.59-1.89)  | 0.75(0.5-1.13)  |
| Ischemic heart disease | Yes         | 4.59(1.48-14.29) | 3.23(2.66-4.01) |
| Asthma                 | Yes         | NA               | 0.89(0.68-1.19) |
